# Supplementary material
Source: publisher figshare collection journal article supplement (https://acs.figshare.com/ndownloader/files/4082146)
Supplement: Supplementary file 1 [file 4082146]

## Supporting information

### Exploring the Interior of Hollow Fluorescent Carbon Nanoparticles

*Somen Mondal, Tarasankar Das, Prasun Ghosh, Arnab Maity, and Pradipta Purkayastha\**

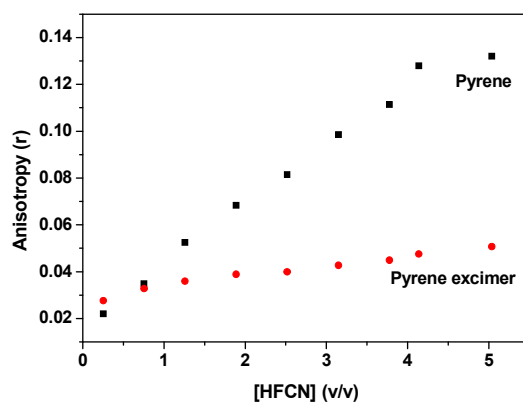

Figure S1. Change in steady state fluorescence anisotropy ( $r$ ) of pyrene monomer and the corresponding excimer with increase in concentration of HFCN.

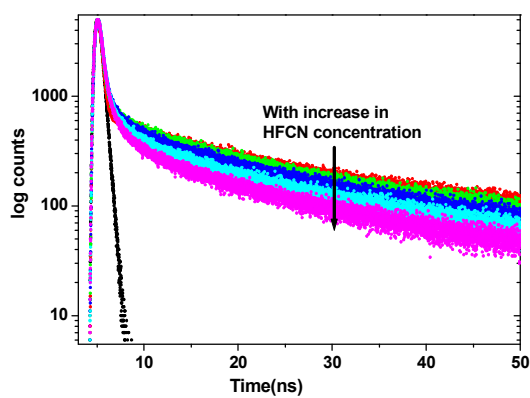

Figure S2. Fluorescence decay data of pyrene with increase in HFCN concentration. The black dots indicate prompt signal. The excitation wavelength is 340 nm and the emission is monitored at 390 nm.

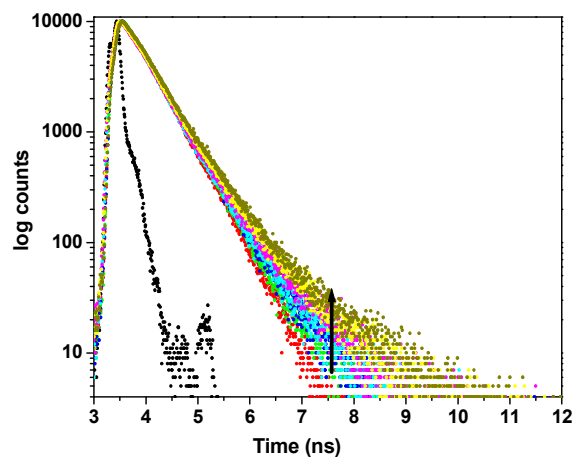

Figure S3. Fluorescence decay data of ox-725 with increase in HFCN concentration. The black dots indicate prompt signal. The excitation wavelength is 635 nm and the emission is monitored at 670 nm.

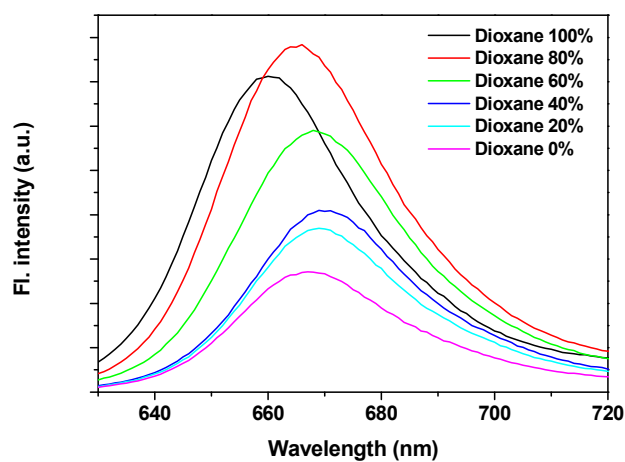

Figure S4. Fluorescence spectra of ox-725 in different water-dioxane mixtures ( $\lambda_{\text{ex}} = 630$  nm).
